# Supplementary material for: A Clinical Outcome of the anti-PD-1 Therapy of Melanoma in Polish Patients Is Mediated by Population-Specific Gut Microbiome Composition
Source: Preprints.org preprint supplement (doi:10.20944/preprints202210.0009.v1), 2022-10-03
Supplement: Supplementary file 1 [file Table1SI.xlsx]

## Sheet: Arkusz1
	FastQC		Contigs					Bins		MAGs
Sample	Number of reads	Number of reads (length >145)	Assembly	Number of contigs	Maximum contig length	Number of base pairs	N50	Binned contigs	Number of bins	Number of high-quality MAGs
001.1.0.0	37243273	36268570	metaSPAdes	31223	736340	283801471	20284	8013	64	42	R
034.1.0.0	45927737	44677086	metaSPAdes	34032	671935	299852110	19608	9724	70	51	NR
008.1.0.0	40378444	39251814	metaSPAdes	40101	683422	350905543	19854	7719	69	51	R
004.1.0.0	44390052	43154224	MEGAHIT	51959	829400	414896466	15231	11517	87	39	NR
055.1.0.0	41773045	40686544	metaSPAdes	20866	860405	222457340	28214	7026	51	39	R
019.1.0.0	34741544	33662416	metaSPAdes	22737	658656	236070568	32364	6832	59	42	R
045.0.0.0	40264060	39194791	metaSPAdes	28392	672091	269847397	19055	7437	56	44	C
002.1.0.0	36989315	36151160	metaSPAdes	20933	568097	245718371	33941	5696	51	31	R
003.1.0.0	41936519	40811756	metaSPAdes	31060	568256	262359784	15794	6934	46	31	R
014.1.0.0	46825481	45694501	metaSPAdes	11565	721985	171728334	40294	3815	37	31	R
064.1.0.0	44884242	43397598	metaSPAdes	29688	828496	321700427	26397	9019	68	49	R
044.1.0.0	38416717	37483933	metaSPAdes	32245	1100065	301293678	22991	9708	74	46	NR
018.1.0.0	40848167	39872458	MEGAHIT	29163	936052	260019095	20662	6953	53	30	NR
016.1.0.0	43063108	41712906	metaSPAdes	27710	746789	250471987	20758	6868	49	34	NR
028.1.0.0	38921907	37864109	metaSPAdes	33222	622205	287093255	18239	7428	57	38	R
009.0.0.0	45367714	44037694	metaSPAdes	23038	907129	223337638	23815	8401	52	33	C
