# Supplementary material for: A Clinical Outcome of the anti-PD-1 Therapy of Melanoma in Polish Patients Is Mediated by Population-Specific Gut Microbiome Composition
Source: Preprints.org preprint supplement (doi:10.20944/preprints202210.0009.v1), 2022-10-03
Supplement: Supplementary file 2 [file TableSI2.xlsx]

## Sheet: MASH
#	Bin Id	dRep Bin Id	Source	GTDB-Tk Classification	MASH ANI primary_cluster	MASH ANI secondary_cluster	Marker lineage	# genomes	# markers	# marker sets	Completeness	Contamination	Strain heterogeneity	Genome size (bp)	# ambiguous bases	# scaffolds	# contigs	N50 (scaffolds)	N50 (contigs)	Mean scaffold length (bp)	Mean contig length (bp)	Longest scaffold (bp)	Longest contig (bp)	GC	GC std (scaffolds > 1kbp)	Coding density	Translation table	# predicted genes	0	1	2	3	4	5
1	bin.003_004.1.0.0	120271.1148.1_120271.1128.1_bin.003_004.1.0.0__	This study	s__Prevotella sp900554695	8	8_0	o__Bacteroidales (UID2716)	92	487	270	97.53	0.09	0.0	3133461	45084	2427	2427	44803	435	355	337	2574	2408	38.9	4.69	-100.0	-1	-1	10	476	1	0	0	0
2	bin.029_001.1.0.0	120271.1148.1_120271.1129.1_bin.029_001.1.0.0__	This study	s__Prevotella sp000436595	1	1_0	o__Bacteroidales (UID2716)	92	487	270	95.54	0.0	0.0	3115532	44289	2526	2526	72836	423	353	336	2602	2452	39.1	4.43	-100.0	-1	-1	22	465	0	0	0	0
3	bin.029_002.1.1.0	120271.1148.1_120271.1130.1_bin.029_002.1.1.0__	This study	s__Prevotellamassilia sp000437675	14	14_1	o__Bacteroidales (UID2657)	160	492	269	96.41	0.0	0.0	2554693	34411	1945	1945	23340	445	360	342	2582	2435	36.6	5.28	-100.0	-1	-1	11	481	0	0	0	0
4	bin.033_004.1.0.0	120271.1148.1_120271.1131.1_bin.033_004.1.0.0__	This study	s__Prevotella sp000436695	2	2_0	o__Bacteroidales (UID2716)	92	487	270	96.3	1.85	28.57	3342668	51638	2721	2721	52465	429	347	328	2540	2335	39.2	4.78	-100.0	-1	-1	13	467	7	0	0	0
5	bin.034_002.1.0.0	120271.1148.1_120271.1132.1_bin.034_002.1.0.0__	This study	s__Prevotellamassilia sp000437675	14	14_1	o__Bacteroidales (UID2657)	160	492	269	96.22	0.0	0.0	2541974	34129	1935	1935	23340	445	359	342	2582	2435	36.6	4.95	-100.0	-1	-1	13	479	0	0	0	0
6	bin.017_034.1.0.0	120271.1148.1_120271.1133.1_bin.017_034.1.0.0__	This study	s__Prevotellamassilia sp900539625	12	12_0	o__Bacteroidales (UID2657)	160	492	269	96.87	0.56	0.0	2622268	34861	2000	2000	27485	436	365	347	3361	3121	37.6	5.01	-100.0	-1	-1	13	477	2	0	0	0
7	bin.023_019.1.0.0	120271.1148.1_120271.1134.1_bin.023_019.1.0.0__	This study	s__Prevotellamassilia sp900541335	15	15_0	o__Bacteroidales (UID2657)	160	492	269	81.17	0.14	50.0	2067522	24895	1669	1669	18379	428	345	331	3530	3246	36.6	3.86	-100.0	-1	-1	104	386	2	0	0	0
8	bin.004_019.1.0.0	120271.1148.1_120271.1135.1_bin.004_019.1.0.0__	This study	s__Prevotella copri	10	10_3	g__Prevotella (UID2724)	55	567	296	92.78	1.21	0.0	3035507	45396	2584	2584	26572	430	344	326	2719	2565	38.9	4.24	-100.0	-1	-1	26	534	7	0	0	0
9	bin.028_055.1.0.0	120271.1148.1_120271.1136.1_bin.028_055.1.0.0__	This study	s__Prevotella nigrescens	16	16_0	g__Prevotella (UID2724)	55	567	296	99.2	0.0	0.0	2519991	39803	2136	2136	83536	418	337	319	2530	2330	37.4	5.55	-100.0	-1	-1	5	562	0	0	0	0
10	bin.013_055.1.0.0	120271.1148.1_120271.1137.1_bin.013_055.1.0.0__	This study	s__Prevotella sp900548585	7	7_0	o__Bacteroidales (UID2716)	92	487	270	96.65	0.37	100.0	2250702	31710	1845	1845	47059	425	355	338	2517	2322	39.6	5.04	-100.0	-1	-1	11	475	1	0	0	0
11	bin.034_004.1.0.0	120271.1148.1_120271.1138.1_bin.034_004.1.0.0__	This study	s__Prevotella sp000434975	5	5_1	o__Bacteroidales (UID2716)	92	487	270	96.5	0.37	0.0	2597270	37489	2034	2034	56031	434	368	350	3197	2974	37.2	4.8	-100.0	-1	-1	13	473	1	0	0	0
12	bin.045_055.1.0.0	120271.1148.1_120271.1139.1_bin.045_055.1.0.0__	This study	s__Prevotella copri	10	10_4	g__Prevotella (UID2724)	55	567	296	98.82	1.98	22.22	3531011	53941	3046	3046	41727	427	341	324	2513	2334	39.1	4.69	-100.0	-1	-1	5	553	9	0	0	0
13	bin.047_008.1.0.0	120271.1148.1_120271.1140.1_bin.047_008.1.0.0__	This study	s__Prevotella sp900540415	6	6_1	o__Bacteroidales (UID2716)	92	487	270	98.4	0.56	0.0	3436725	42830	2562	2562	121164	453	381	364	2725	2601	38.8	5.04	-100.0	-1	-1	14	471	2	0	0	0
14	bin.048_045.0.0.0	120271.1148.1_120271.1141.1_bin.048_045.0.0.0__	This study	s__Prevotella sp003447235	13	13_0	g__Prevotella (UID2722)	64	532	281	97.92	2.49	61.54	2959138	35729	2350	2350	50963	435	356	341	2528	2354	37.6	5.01	-100.0	-1	-1	8	511	13	0	0	0
15	bin.072_004.1.0.0	120271.1148.1_120271.1142.1_bin.072_004.1.0.0__	This study	s__Prevotella sp000436915	3	3_0	g__Prevotella (UID2724)	55	567	296	94.76	1.52	0.0	2675043	42451	2199	2199	52248	435	360	341	2580	2365	37.9	5.48	-100.0	-1	-1	23	539	5	0	0	0
16	bin.051_001.1.0.0	120271.1148.1_120271.1143.1_bin.051_001.1.0.0__	This study	s__Prevotella sp900540415	6	6_2	o__Bacteroidales (UID2716)	92	487	270	98.21	1.11	66.67	3431429	42830	2564	2564	81591	454	381	364	2725	2601	38.9	5.11	-100.0	-1	-1	12	469	6	0	0	0
17	bin.051_004.1.0.0	120271.1148.1_120271.1144.1_bin.051_004.1.0.0__	This study	s__Prevotella sp900313215	9	9_4	g__Prevotella (UID2724)	55	567	296	91.55	1.69	0.0	2959659	43917	2571	2571	35630	421	334	317	5041	4739	38.6	5.62	-100.0	-1	-1	48	509	10	0	0	0
18	bin.067_034.1.0.0	120271.1148.1_120271.1145.1_bin.067_034.1.0.0__	This study	s__Prevotella sp000434975	5	5_2	o__Bacteroidales (UID2716)	92	487	270	98.72	2.59	100.0	2707845	38649	2115	2115	45688	428	366	348	2656	2504	37.3	5.19	-100.0	-1	-1	5	474	8	0	0	0
19	bin.070_034.1.0.0	120271.1148.1_120271.1146.1_bin.070_034.1.0.0__	This study	s__Prevotella pectinovora	4	4_0	o__Bacteroidales (UID2716)	92	487	270	95.49	0.37	100.0	2766394	39751	2156	2156	60170	440	365	346	2534	2340	38.7	4.97	-100.0	-1	-1	20	466	1	0	0	0
20	bin.075_004.1.0.0	120271.1148.1_120271.1147.1_bin.075_004.1.0.0__	This study	g__Prevotellamassilia			o__Bacteroidales (UID2657)	160	492	269	45.72	0.5	0.0	1411526	16975	1286	1286	37384	397	318	305	2478	2282	37.1	6.34	-100.0	-1	-1	259	231	2	0	0	0
21	G89180_bin_contigs	120271.1150.1_120271.102.1_G89180_bin_contigs__	Tett et al., 2019, Cell Host & Microbe 26, 666–679	s__Prevotella sp900313215	9	9_5	g__Prevotella (UID2724)	55	567	296	96.25	1.18	25.0	3087039	44623	2639	2639	28095	422	334	317	2620	2455	38.7	4.67	-100.0	-1	-1	17	546	4	0	0	0
22	WL.37.ST_Clade_D_binMAGS	120271.1150.1_120271.1024.2_WL.37.ST_Clade_D_bin__MAGS	Tett et al., 2019, Cell Host & Microbe 26, 666–679	s__Prevotella sp900546535	11	11_4	g__Prevotella (UID2724)	55	567	296	92.57	2.76	30.77	3291546	50561	2756	2756	71771	437	351	332	2635	2466	39.0	4.87	-100.0	-1	-1	58	498	10	1	0	0
23	iAQ1173_10E_S64scaffolds_1000	120271.1150.1_120271.116.1_iAQ1173_10E_S64scaffolds_1000__	Tett et al., 2019, Cell Host & Microbe 26, 666–679	s__Prevotella sp900313215	9	9_6	g__Prevotella (UID2724)	55	567	296	98.31	1.86	0.0	3140342	46910	2670	2670	68059	426	342	325	2633	2471	38.9	4.82	-100.0	-1	-1	7	556	3	0	1	0
24	iAA917_12E_S68scaffolds_1000	120271.1150.1_120271.150.1_iAA917_12E_S68scaffolds_1000__	Tett et al., 2019, Cell Host & Microbe 26, 666–679	s__Prevotella copri_A	11	11_8	g__Prevotella (UID2724)	55	567	296	98.31	2.45	41.18	3906083	60160	3315	3315	60899	431	347	329	3023	2814	39.0	4.95	-100.0	-1	-1	6	553	7	0	0	1
25	CON-037_bin_contigs	120271.1150.1_120271.164.1_CON-037_bin_contigs__	Tett et al., 2019, Cell Host & Microbe 26, 666–679	s__Prevotella copri	10	10_5	g__Prevotella (UID2724)	55	567	296	99.32	2.14	0.0	3632780	56849	3073	3073	73860	438	350	332	2920	2695	39.2	5.05	-100.0	-1	-1	3	557	6	1	0	0
26	NLM002_bin_contigs	120271.1150.1_120271.35.1_NLM002_bin_contigs__	Tett et al., 2019, Cell Host & Microbe 26, 666–679	s__Prevotella sp900313215	9	9_1	g__Prevotella (UID2724)	55	567	296	98.24	2.03	0.0	3381873	50428	2928	2928	44669	418	336	318	2968	2783	38.7	4.97	-100.0	-1	-1	8	553	5	1	0	0
27	HV-21_Clade_D_binMAGS	120271.1150.1_120271.378.2_HV-21_Clade_D_bin__MAGS	Tett et al., 2019, Cell Host & Microbe 26, 666–679	s__Prevotella sp900546535	11	11_5	g__Prevotella (UID2724)	55	567	296	93.37	0.68	0.0	3073378	46888	2527	2527	51848	443	357	338	2638	2470	39.3	4.62	-100.0	-1	-1	34	530	3	0	0	0
28	T2D-053_bin_contigs	120271.1150.1_120271.38.1_T2D-053_bin_contigs__	Tett et al., 2019, Cell Host & Microbe 26, 666–679	s__Prevotella sp900313215	9	9_2	g__Prevotella (UID2724)	55	567	296	98.14	0.84	0.0	3370131	50363	2933	2933	56087	424	335	318	2632	2470	38.8	5.14	-100.0	-1	-1	8	556	3	0	0	0
29	HV-20_bin_contigs	120271.1150.1_120271.40.1_HV-20_bin_contigs__	Tett et al., 2019, Cell Host & Microbe 26, 666–679	s__Prevotella sp900557035	11	11_10	g__Prevotella (UID2724)	55	567	296	98.14	2.36	10.0	3730146	57144	3257	3257	51825	424	339	321	2540	2347	39.1	5.03	-100.0	-1	-1	7	550	10	0	0	0
30	LD-47_bin_contigs	120271.1150.1_120271.45.1_LD-47_bin_contigs__	Tett et al., 2019, Cell Host & Microbe 26, 666–679	s__Prevotella copri_A	11	11_6	g__Prevotella (UID2724)	55	567	296	98.31	1.35	0.0	3587625	55036	2945	2945	85847	442	360	341	2519	2329	39.0	4.53	-100.0	-1	-1	6	556	5	0	0	0
31	GCF_002224675.1_ASM222467v1_genomic	120271.1150.1_120271.53.1_GCF_002224675.1_ASM222467v1_genomic__	Tett et al., 2019, Cell Host & Microbe 26, 666–679	s__Prevotella copri_A	11	11_9	g__Prevotella (UID2724)	55	567	296	98.65	1.86	45.45	3920563	58885	3335	3335	118245	427	342	324	3065	2849	39.0	4.27	-100.0	-1	-1	5	556	5	0	1	0
32	O2.UC16-1_Clade_D_binMAGS	120271.1150.1_120271.547.2_O2.UC16-1_Clade_D_bin__MAGS	Tett et al., 2019, Cell Host & Microbe 26, 666–679	s__Prevotella sp900546535	11	11_1	g__Prevotella (UID2724)	55	567	296	93.45	1.35	75.0	3155641	48588	2645	2645	29158	439	351	332	4091	3693	39.3	4.57	-100.0	-1	-1	40	519	8	0	0	0
33	MH0423_bin_contigs	120271.1150.1_120271.71.1_MH0423_bin_contigs__	Tett et al., 2019, Cell Host & Microbe 26, 666–679	s__Prevotella sp900313215	9	9_3	g__Prevotella (UID2724)	55	567	296	98.31	2.0	11.11	3506252	52706	3086	3086	68211	422	332	315	2776	2602	38.7	5.04	-100.0	-1	-1	7	551	9	0	0	0
34	GCF_000157935.1_ASM15793v1_genomic	120271.1150.1_120271.76.1_GCF_000157935.1_ASM15793v1_genomic__	Tett et al., 2019, Cell Host & Microbe 26, 666–679	s__Prevotella copri	10	10_6	g__Prevotella (UID2724)	55	567	296	98.31	1.35	0.0	3512473	51060	3044	3044	442348	423	329	312	2513	2338	39.2	5.17	-100.0	-1	-1	7	555	5	0	0	0
35	iA622_GAGATTCC-TAATCTTAscaffolds_1000	120271.1150.1_120271.80.1_iA622_GAGATTCC-TAATCTTAscaffolds_1000__	Tett et al., 2019, Cell Host & Microbe 26, 666–679	s__Prevotella sp900546535	11	11_3	g__Prevotella (UID2724)	55	567	296	98.48	1.18	20.0	3931063	61240	3273	3273	82622	442	353	335	4048	3648	38.9	4.94	-100.0	-1	-1	6	556	5	0	0	0
36	iAA108_GAGATTCC-GGCTCTGAscaffolds_1000	120271.1150.1_120271.82.1_iAA108_GAGATTCC-GGCTCTGAscaffolds_1000__	Tett et al., 2019, Cell Host & Microbe 26, 666–679	s__Prevotella copri	10	10_1	g__Prevotella (UID2724)	55	567	296	98.99	2.03	0.0	3822548	58583	3258	3258	103845	432	343	325	5934	5587	39.0	4.99	-100.0	-1	-1	4	552	10	1	0	0
37	O2_UC34_0_bin_contigs	120271.1150.1_120271.84.1_O2_UC34_0_bin_contigs__	Tett et al., 2019, Cell Host & Microbe 26, 666–679	s__Prevotella copri	10	10_3	g__Prevotella (UID2724)	55	567	296	97.47	1.01	0.0	3299414	50357	2793	2793	54276	430	348	330	2513	2337	39.3	4.63	-100.0	-1	-1	13	550	4	0	0	0
38	SZAXPI015235-21_bin_contigs	120271.1150.1_120271.89.1_SZAXPI015235-21_bin_contigs__	Tett et al., 2019, Cell Host & Microbe 26, 666–679	s__Prevotella copri_A	11	11_7	g__Prevotella (UID2724)	55	567	296	98.14	1.86	50.0	3780965	58389	3127	3127	53249	439	357	339	2524	2335	39.0	4.62	-100.0	-1	-1	7	555	4	0	1	0
39	V1_UC56_0_bin_contigs	120271.1150.1_120271.91.1_V1_UC56_0_bin_contigs__	Tett et al., 2019, Cell Host & Microbe 26, 666–679	s__Prevotella copri	10	10_2	g__Prevotella (UID2724)	55	567	296	98.99	2.2	11.11	3584098	55416	3010	3010	101099	431	350	331	3034	2819	38.9	4.46	-100.0	-1	-1	4	556	6	1	0	0
40	CCIS87116798ST-4-0_bin_contigs	120271.1150.1_120271.93.1_CCIS87116798ST-4-0_bin_contigs__	Tett et al., 2019, Cell Host & Microbe 26, 666–679	s__Prevotella sp900546535	11	11_2	g__Prevotella (UID2724)	55	567	296	98.14	1.72	37.5	3318715	51258	2763	2763	64774	440	354	336	2631	2461	39.2	5.11	-100.0	-1	-1	8	551	8	0	0	0
